# Supplementary material for: A novel Tm 3+ -doped Tb 3 Al 3 Ga 2 O 12 magneto-optic crystal for Faraday isolators
Source: Royal Society of Chemistry journal article supplement (doi:10.1039/d4ce01300j), 2025-01-01
Supplement: d4ce01300j1.pdf [file d4ce01300j1.pdf]

## Supporting information

# A novel $\text{Tm}^{3+}$ doped $\text{Tb}_3\text{Al}_3\text{Ga}_2\text{O}_{12}$ magneto-optic crystal for Faraday isolators.

*Xianhui Xin<sup>1</sup>, Yuankai Hao<sup>1</sup>, Xianxian Yang<sup>1</sup>, Zhen Zhang<sup>1</sup>, Chunquan Li<sup>1</sup>, Hongyang*

*Zhao<sup>2</sup>, Na Lin<sup>1,\*</sup>, Xiuwei Fu<sup>1,\*</sup> and Zhitai Jia<sup>1,3</sup>*

<sup>a</sup> State Key Laboratory of Crystal Materials, Shandong University, Jinan, Shandong  
250100, China

<sup>b</sup> Hubei Key Laboratory of Plasma Chemistry and Advanced Materials, Wuhan  
Institute of Technology, Wuhan 430205, China.

<sup>c</sup> Shandong Research Institute of Industrial Technology, Jinan, Shandong 250100,  
China

\* Corresponding author: [linna@sdu.edu.cn](mailto:linna@sdu.edu.cn), [fxw@sdu.edu.cn](mailto:fxw@sdu.edu.cn)

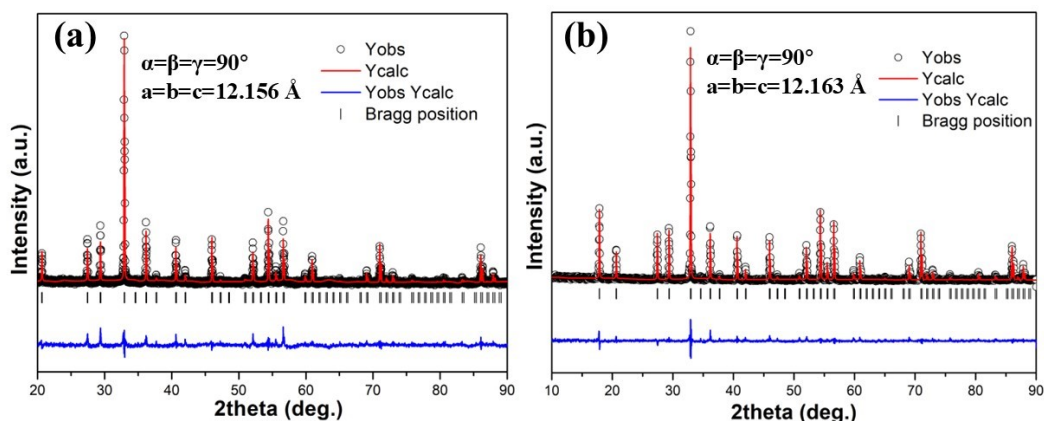

Figure S1. Refined XRD patterns of crystals: (a) Tm: TAGG, (b) TAGG.
